# Supplementary material for: The effect of doping temperature on the nitrogen-bonding configuration of nitrogen-doped graphene by hydrothermal treatment
Source: Royal Society of Chemistry journal article supplement (doi:10.1039/c6ra26426c), 2017-01-01
Supplement: c6ra26426c1.pdf [file c6ra26426c1.pdf]

## Supplementary Information

### **The effect of doping temperature on nitrogen-bonding configuration of nitrogen-doped graphene by hydrothermal treatment**

Jun-ho Song,<sup>a</sup> Chang-Min Kim,<sup>a</sup> Euntae Yang,<sup>a</sup> Moon-Ho Ham,<sup>b</sup> and In S. Kim<sup>a,c\*</sup>

*a. School of Earth Sciences and Environmental Engineering, Gwangju Institute of Science and Technology (GIST), 123 Cheomdangwagi-ro, Buk-gu, Gwangju 61005, Korea*

*b. School of Materials Science and Engineering, Gwangju Institute of Science and Technology (GIST), 123 Cheomdangwagi-ro, Buk-gu, Gwangju 61005, Korea*

*c. Global Desalination Research Center (GDRC), Gwangju Institute of Science and Technology (GIST), 123 Cheomdangwagi-ro, Buk-gu, Gwangju 61005, Korea*

†E-mail : iskim@gist.ac.kr

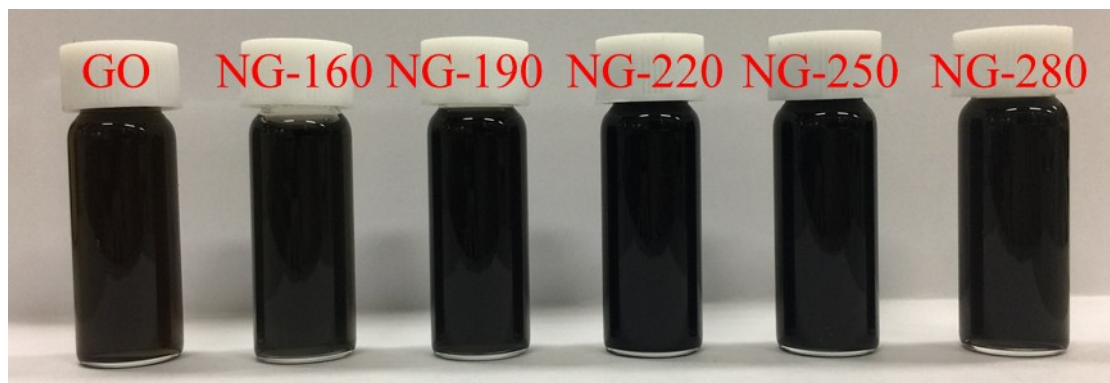

**Fig. S1** Photograph of the dark brown solution of GO and NG sample. (Conc. 0.5mg/mL)

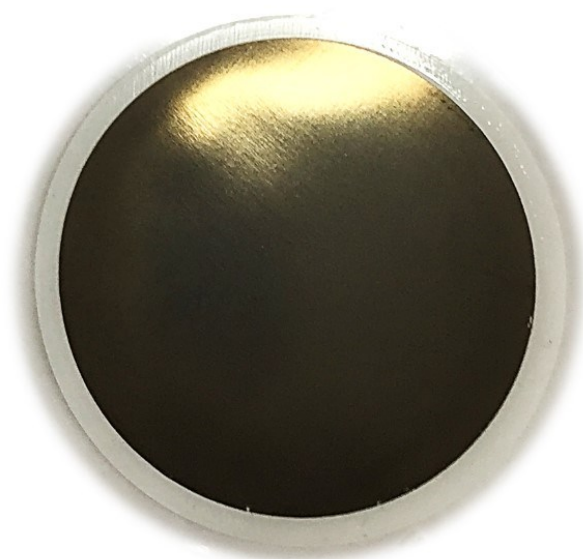

**Fig. S2** Photograph of the typical filtrated NG on ceramic substrate; Shiny dark black one is nitrogen-doped graphene part and below one is ceramic substrate (47mm).

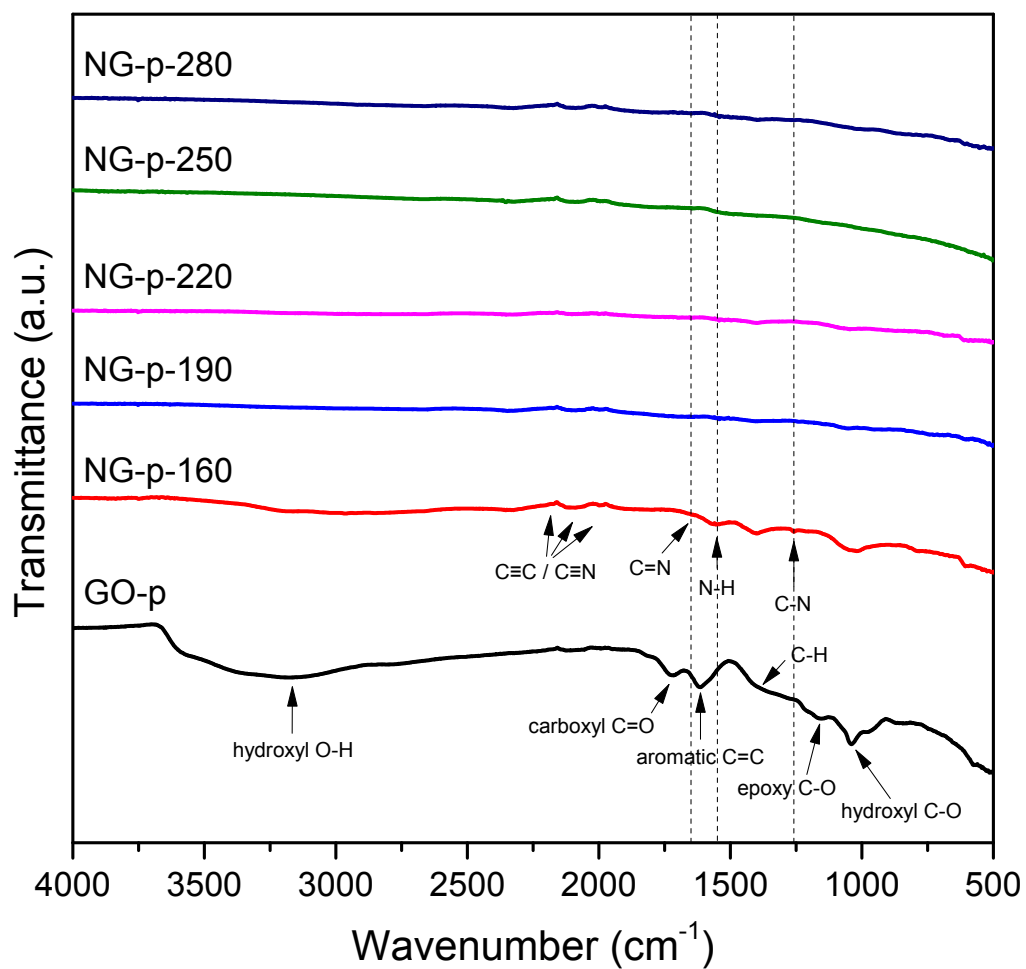

**Fig. S3** FT-IR spectra of GO and NG powder samples synthesized by different doping temperature.

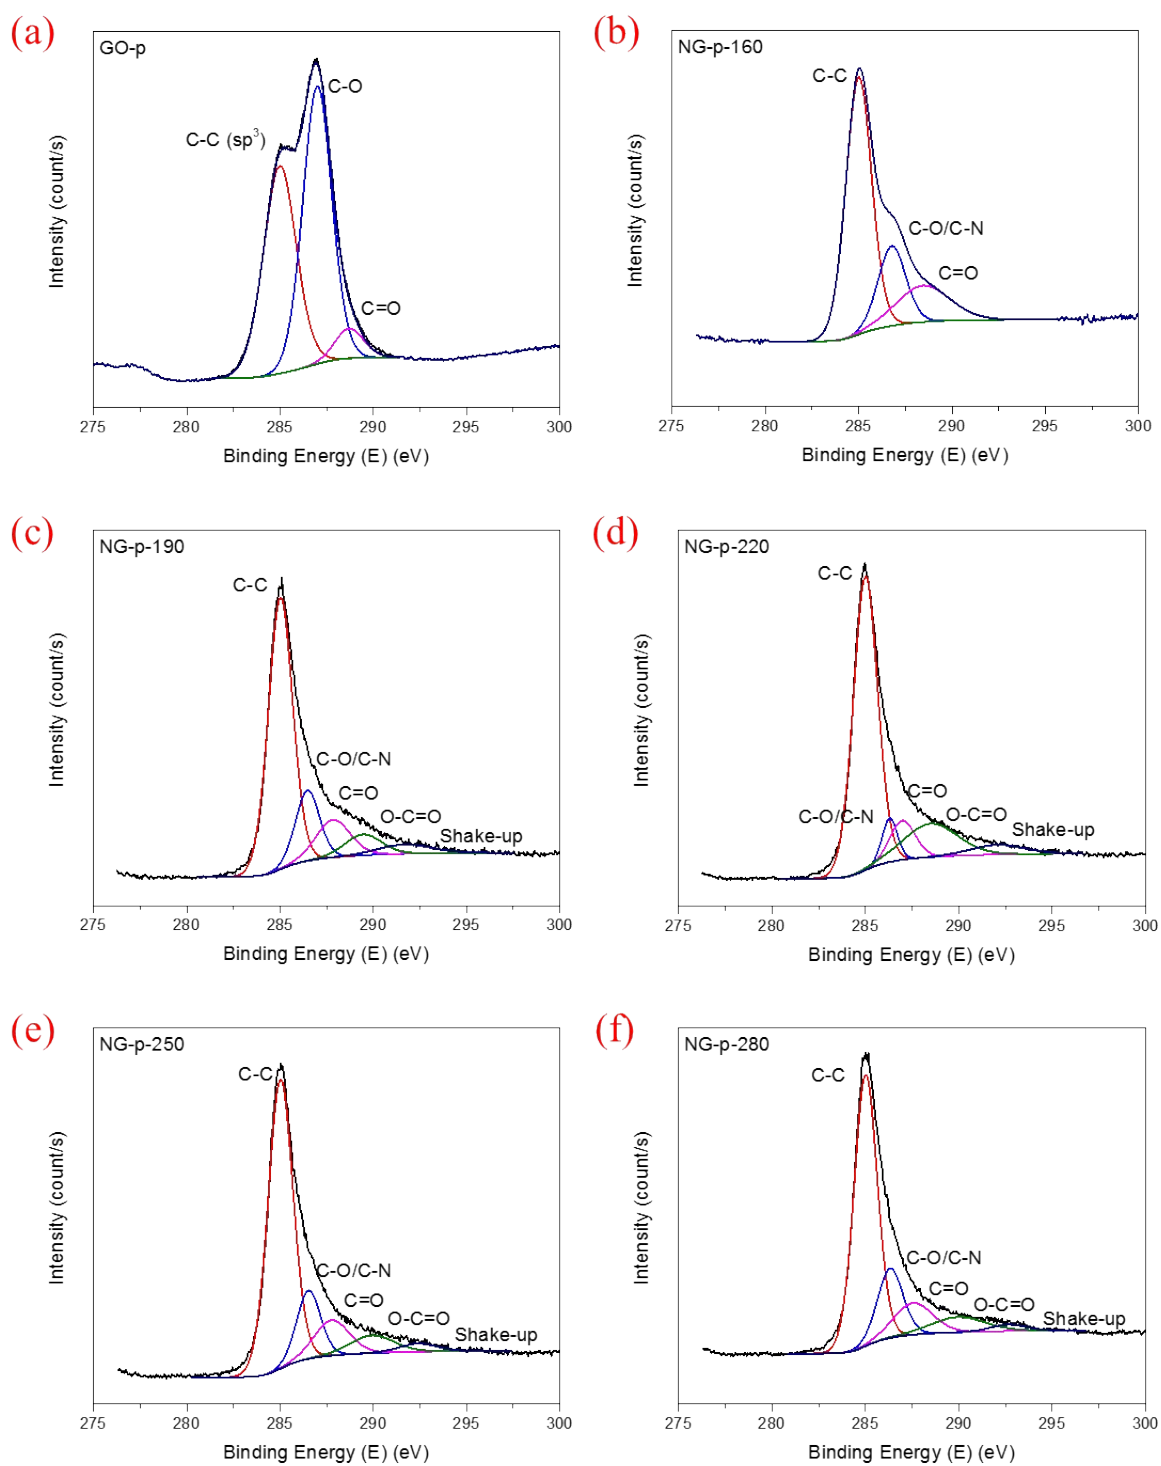

**Fig. S4** High resolution of C 1s spectra of powder samples: (a) GO, (b) NG-p-160, (c) NG-p-190, (d) NG-p-220, (e) NG-p-250, (f) NG-p-280.

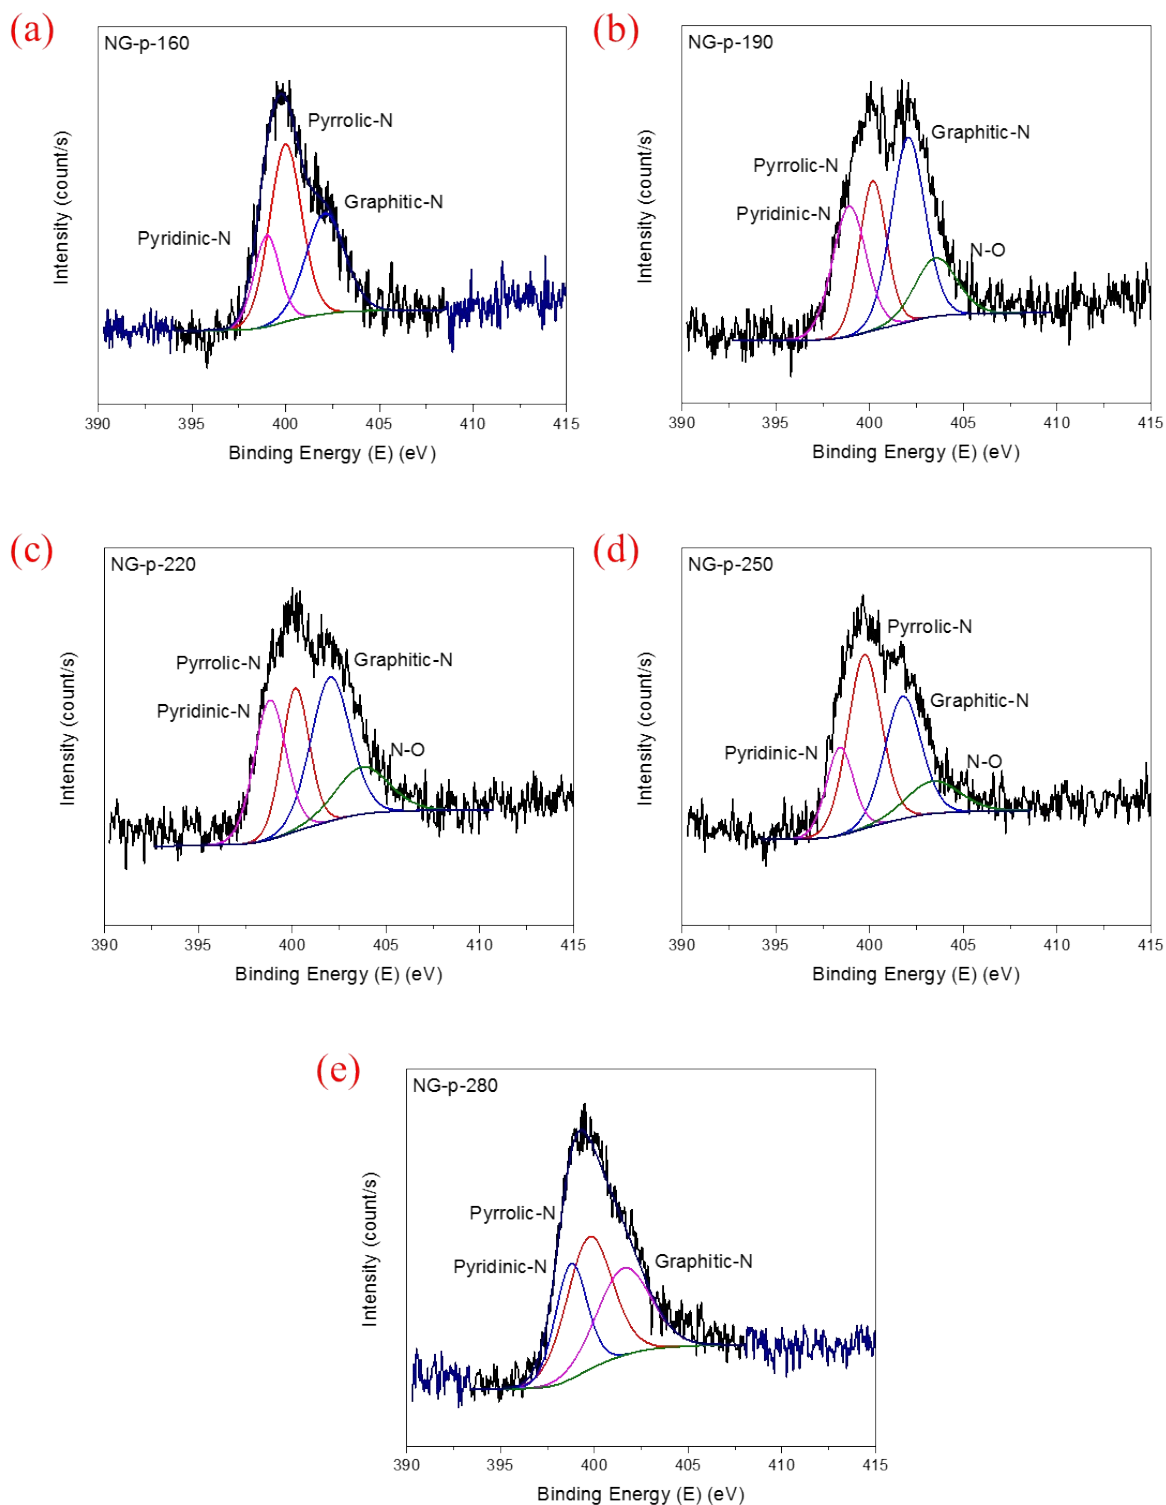

**Fig. S5** High resolution of N 1s of NG powder samples; (a)NG-p-160, (b)NG-p-190, (c)NG-p-220, (d)NG-p-250, (e)NG-p-280

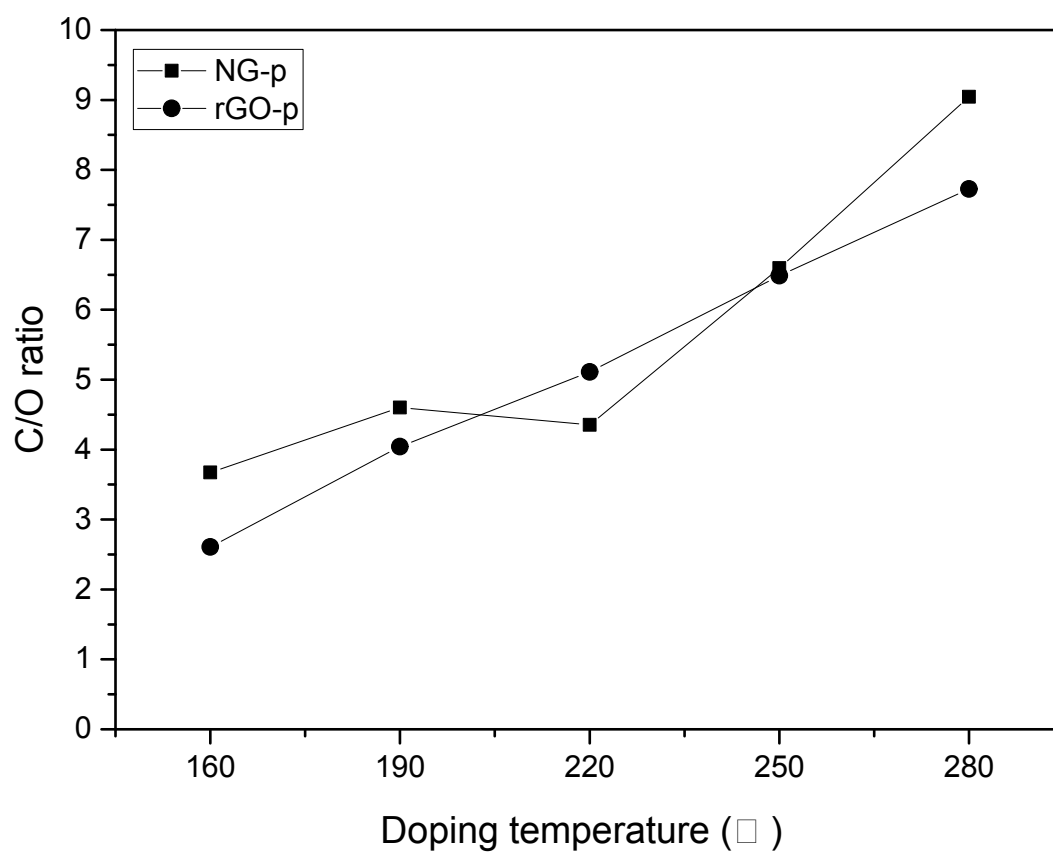

**Fig. S6** The C/O ratio (i.e. reduction degree) comparison between NG and rGO powders by doping temperature. It indicates that NG-p is generally higher than that of rGO-p, in some case, rGO-p is greater than or similar to that of NG-p.

**Table. S1** List of parameters estimated from normalized Raman data for various samples

|                 | <b>D peak</b> | <b>I<sub>D</sub></b> | <b>FWHM(D)</b> | <b>G peak</b> | <b>I<sub>G</sub></b> | <b>FWHM(G)</b> | <b>I<sub>D</sub>/I<sub>G</sub></b> |
|-----------------|---------------|----------------------|----------------|---------------|----------------------|----------------|------------------------------------|
| <b>GO-p</b>     | 1350          | 0.967918             | 173.3          | 1592          | 0.922506             | 109.5          | 1.049                              |
| <b>NG-p-160</b> | 1349          | 0.975473             | 179.6          | 1582          | 0.848722             | 100.7          | 1.149                              |
| <b>NG-p-190</b> | 1350          | 0.974062             | 218.2          | 1584          | 0.842853             | 97.6           | 1.156                              |
| <b>NG-p-220</b> | 1347          | 0.970771             | 201.5          | 1585          | 0.797519             | 94.9           | 1.217                              |
| <b>NG-p-250</b> | 1347          | 0.979484             | 217.5          | 1589          | 0.789652             | 95.1           | 1.240                              |
| <b>NG-p-280</b> | 1348          | 0.965377             | 200.4          | 1587          | 0.764012             | 95.8           | 1.264                              |
